# Supplementary material for: Fabrication and characterization of novel lignocellulosic biomass tailored Fe3O4nanocomposites: influence of annealing temperature and chlorazol black E sequestration
Source: Royal Society of Chemistry journal article supplement (doi:10.1039/c5ra20605g), 2015-01-01
Supplement: c5ra20605g1.pdf [file c5ra20605g1.pdf]

## Electronic Supplementary Information

### **Fabrication and characterization of novel lignocellulosic biomass tailored Fe<sub>3</sub>O<sub>4</sub> nanocomposites: influence of annealing temperature and chlorazol black E sequestration**

Md. Juned K. Ahmed and M. Ahmaruzzaman\*

*Department of Chemistry, National Institute of Technology Silchar, Silchar-788010, India*

*Corresponding author. Tel. +91-3842242915; Fax: +91-3842224797. E-mail address:  
md\_a2002@rediffmail.com (M. Ahmaruzzaman)*

## 2. Experimental

The percent removal and sequestration capacity of the LB, IONPs, and LB-IONCs were calculated using the following equations:

Percentage removal of the dye is predicted by:

$$\% \text{ removal} = \frac{(C_o - C_e)}{C_o} \times 100 \quad (S1)$$

Sequestration capacity is estimated by:

$$q_e = \frac{(C_o - C_e) \times V}{m} \quad (S2)$$

where  $C_o$  and  $C_e$  ( $\text{mg L}^{-1}$ ) are the initial and equilibrium liquid phase concentration of the CBE,  $V$  (L) is the volume of the dye sample, and  $m$  (g) is the weight of the adsorbent used.

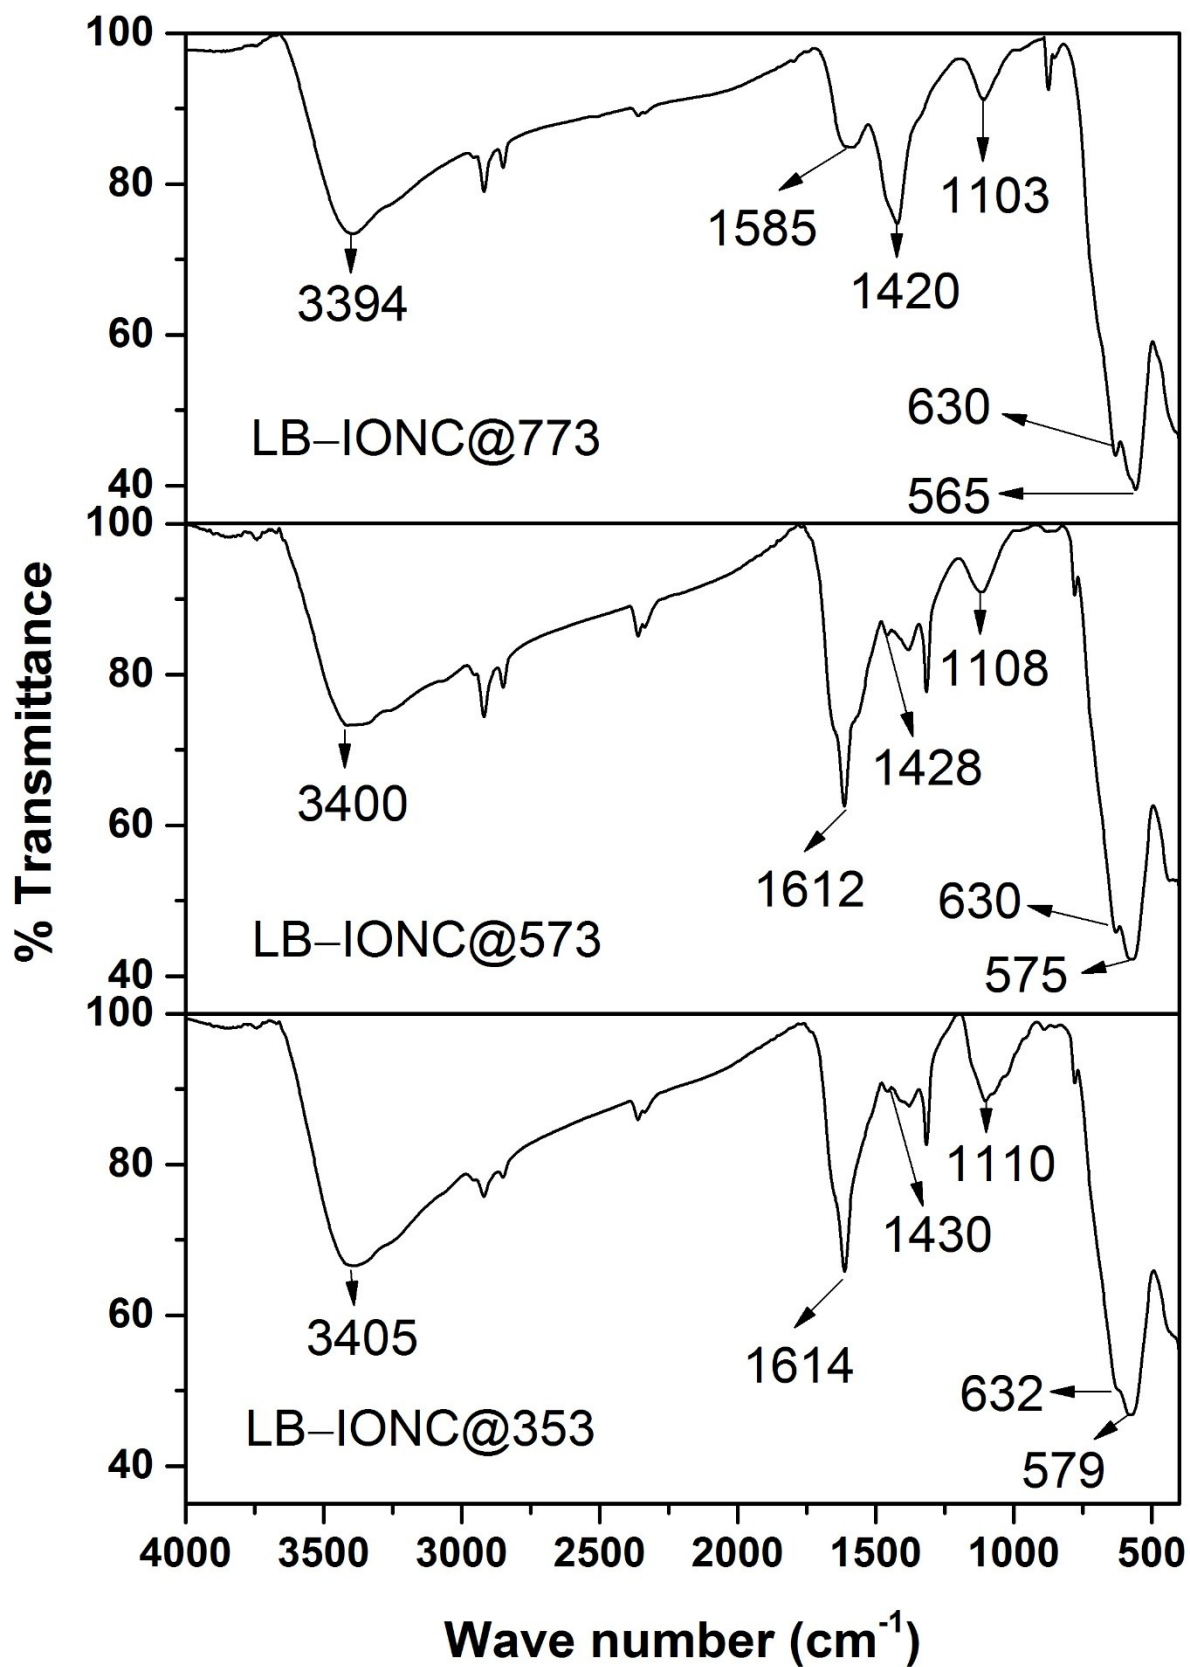

Fig. S1 FTIR spectra of the LB-IONCs.

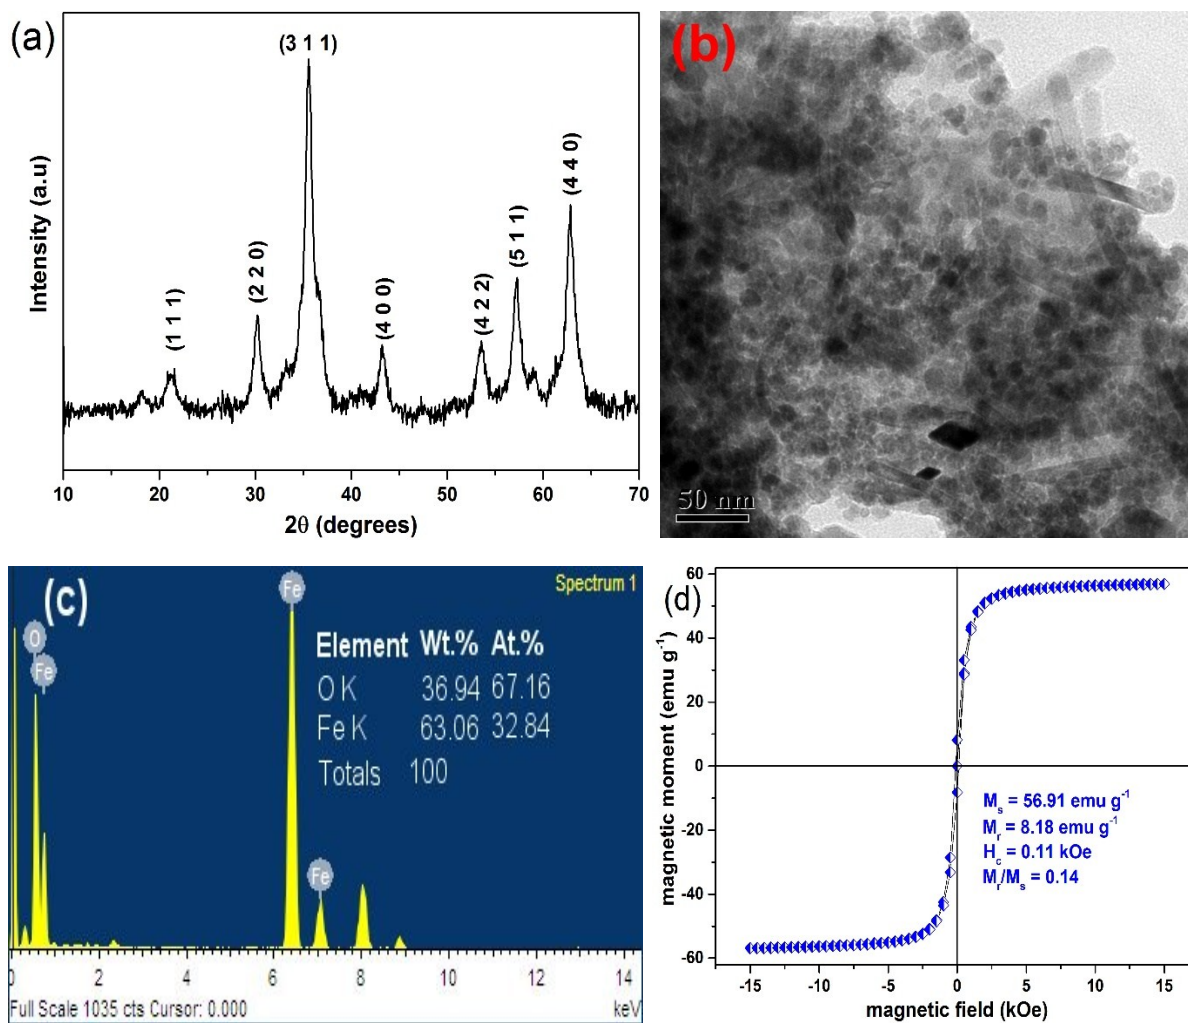

**Fig. S2** (a) XRD pattern, (b) TEM image, (c) EDX spectrum, and (d) room temperature magnetization curve of the bare IONPs.

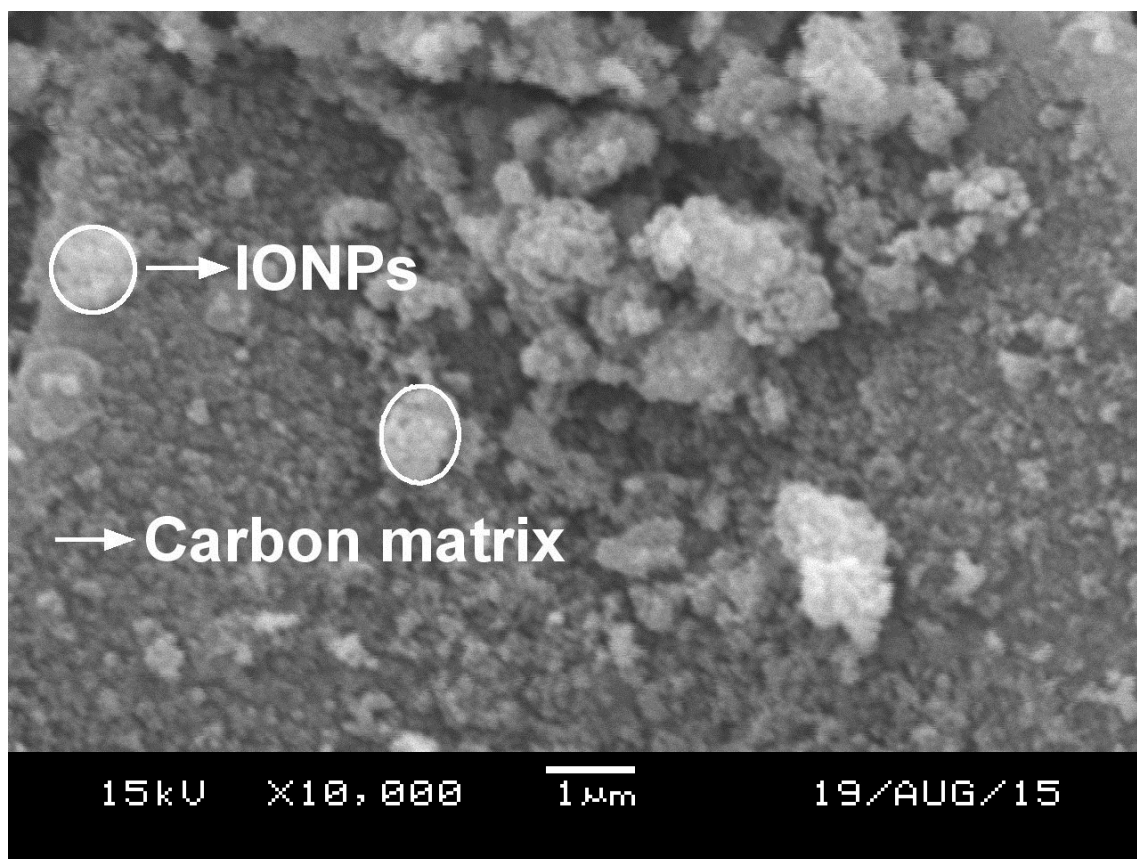

(a)

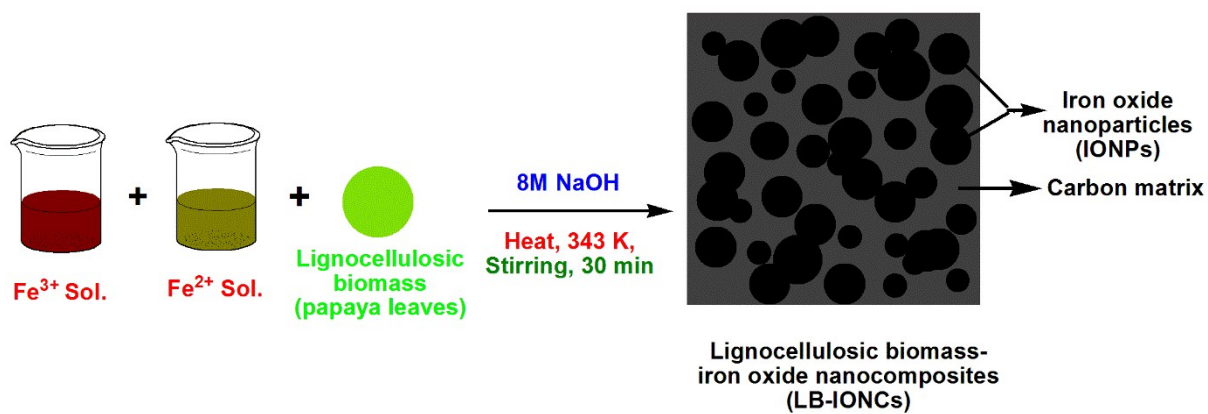

(b)

**Fig. S3** (a) SEM image of the LB-IONC@773 and (b) schematic representation of the synthesized nanocomposites.

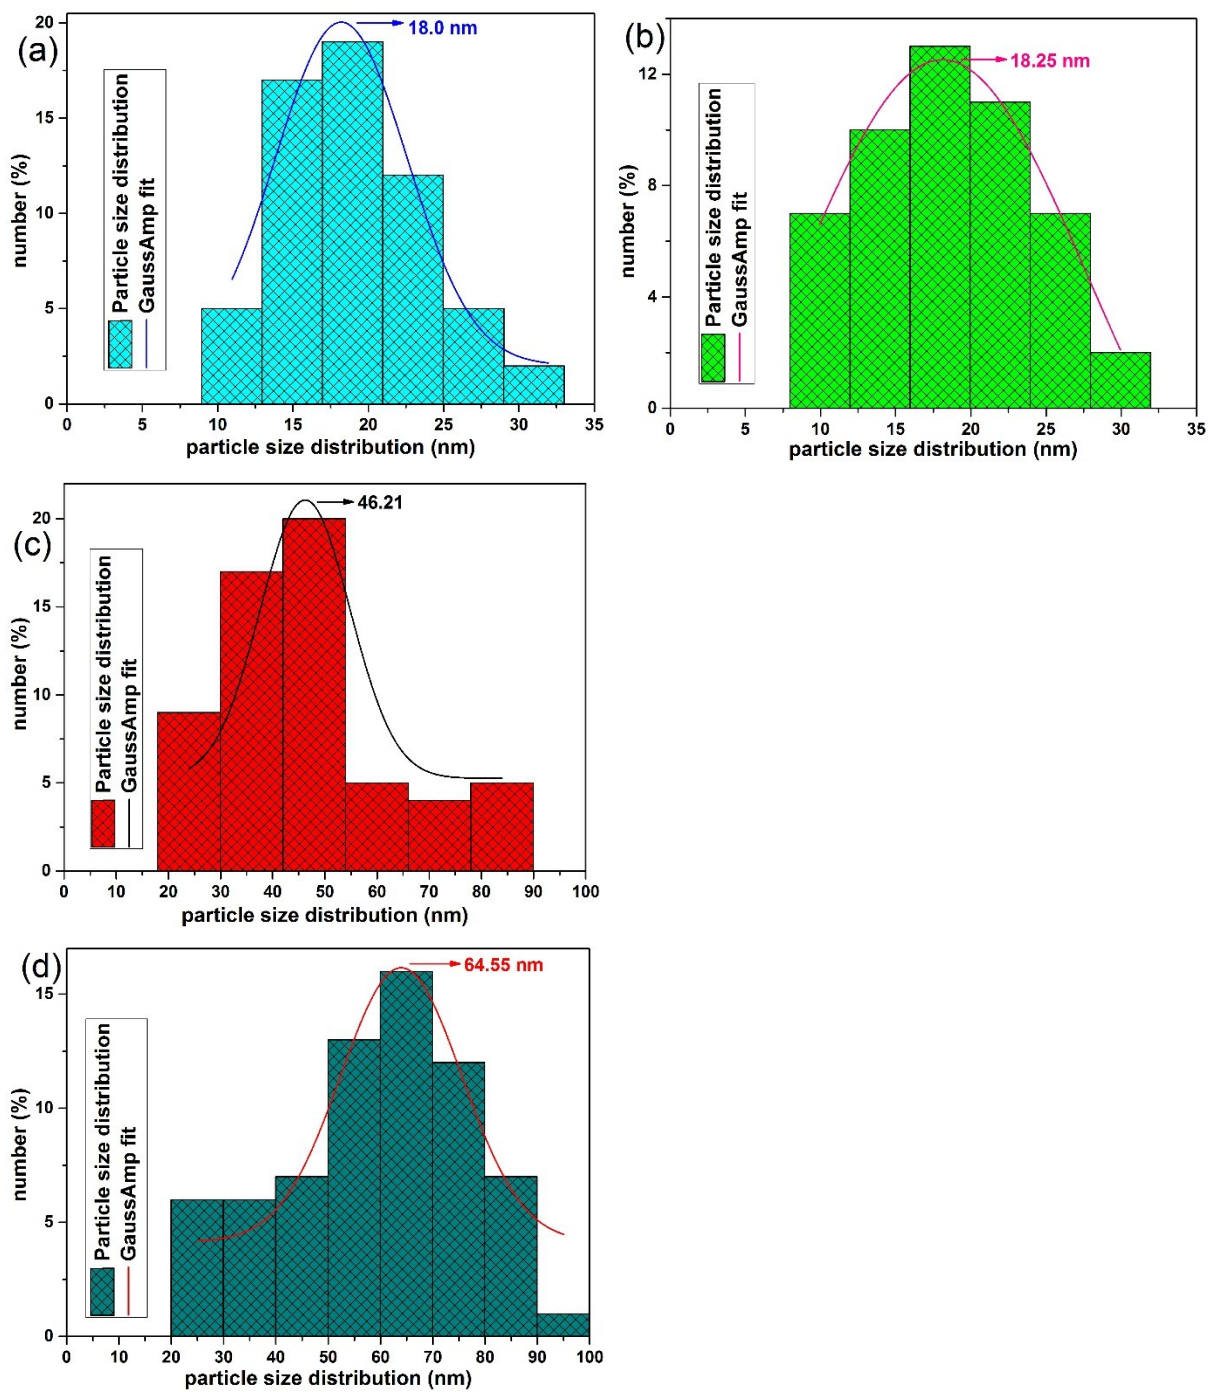

**Fig. S4** Particle size distributions of the (a) LB-IONC@353, (b) LB-IONC@573, (c) LB-IONC@773 (before agglomeration), and (d) LB-IONC@773 (after agglomeration).

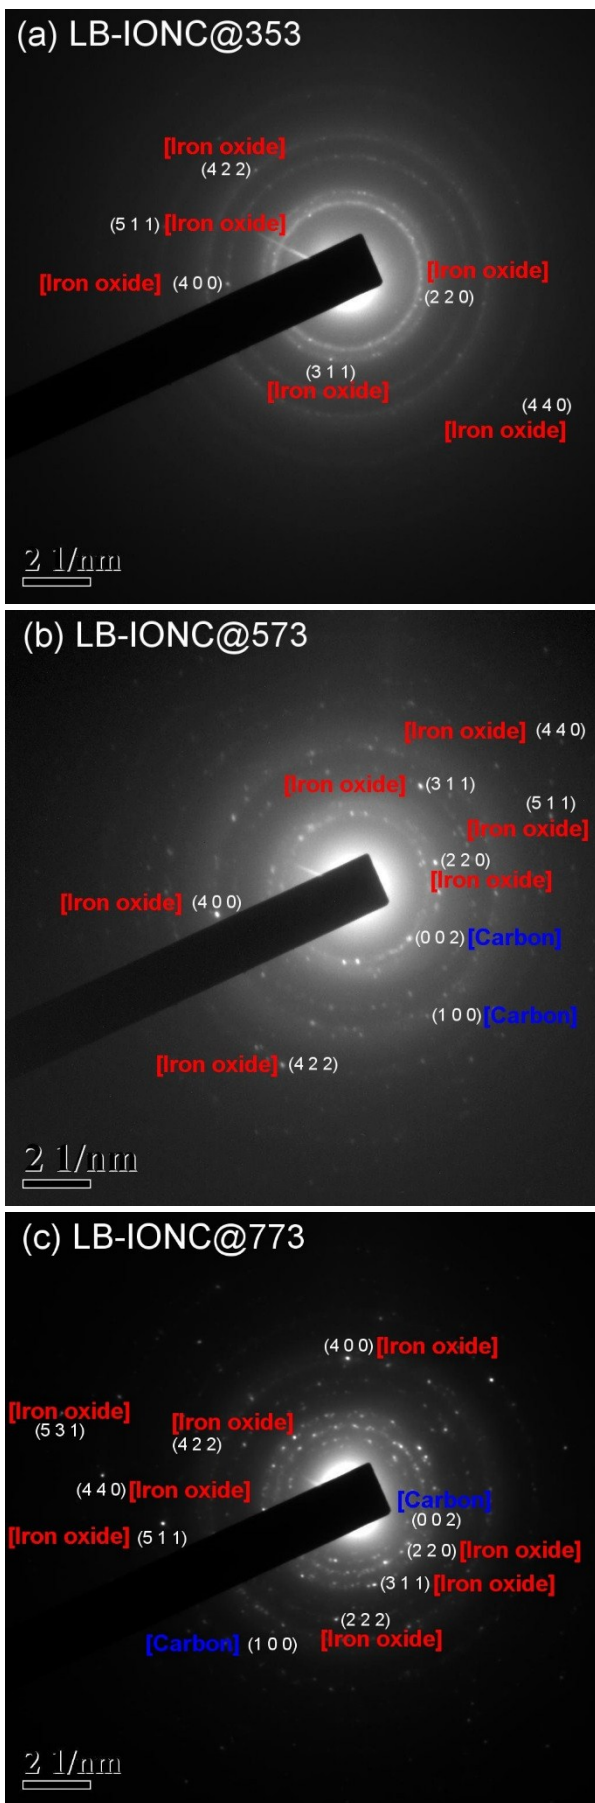

Fig. S5 SAED patterns (a-c) of the LB-IONCs.

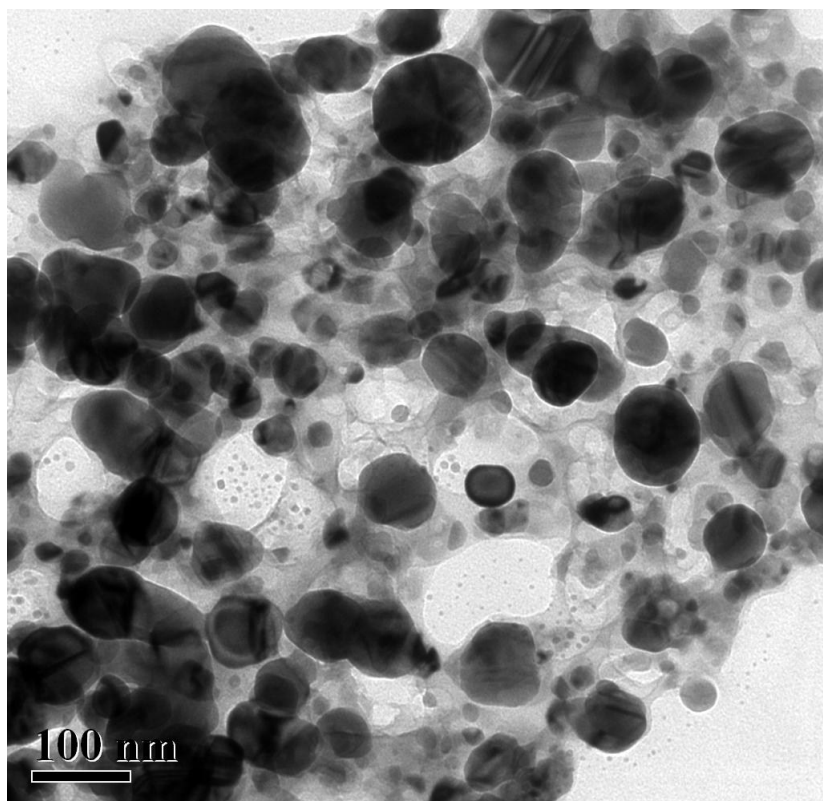

Fig. S6 TEM image of the LB-IONC@773, after removing from the aqueous dispersion.

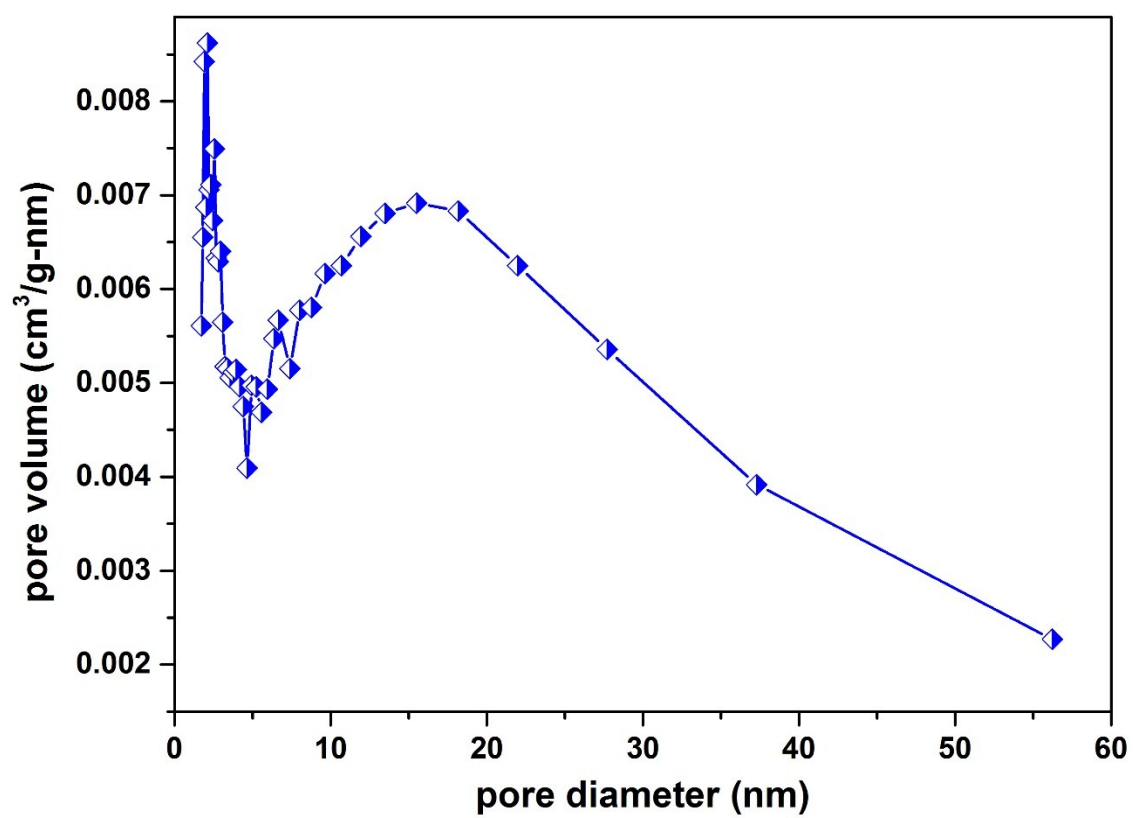

Fig. S7 Pore size distribution of the LB-IONC@773.



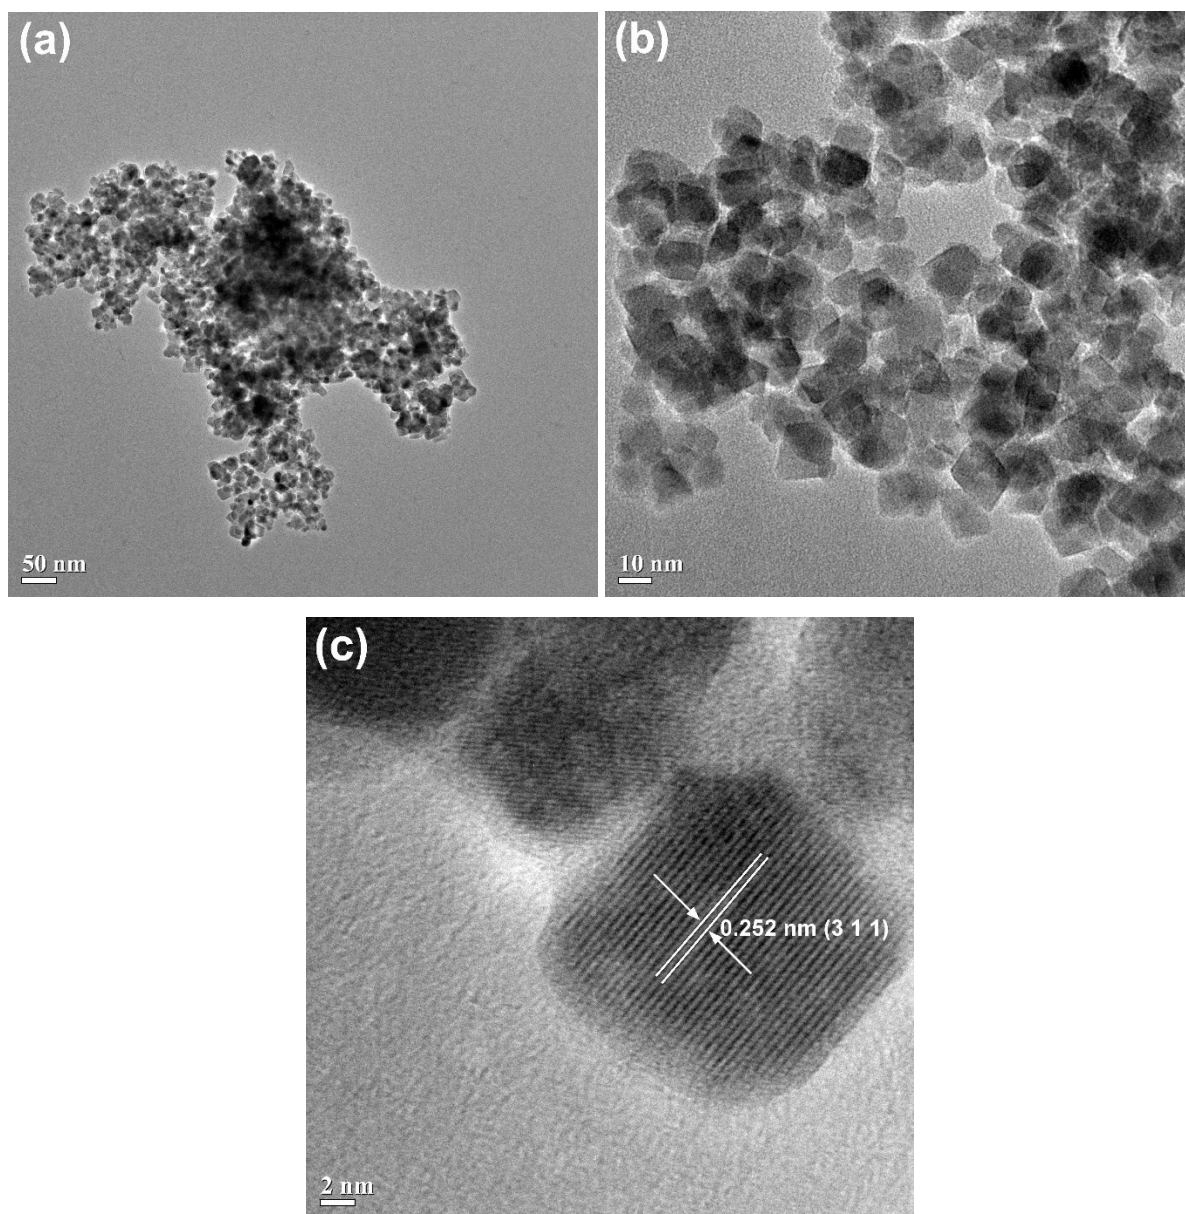

**Fig. S8** TEM images of the LB-IONC@353 (Fe:LB = 2:1) at different scale bars (a) 100 nm, (b) 10 nm, and (c) 2 nm.

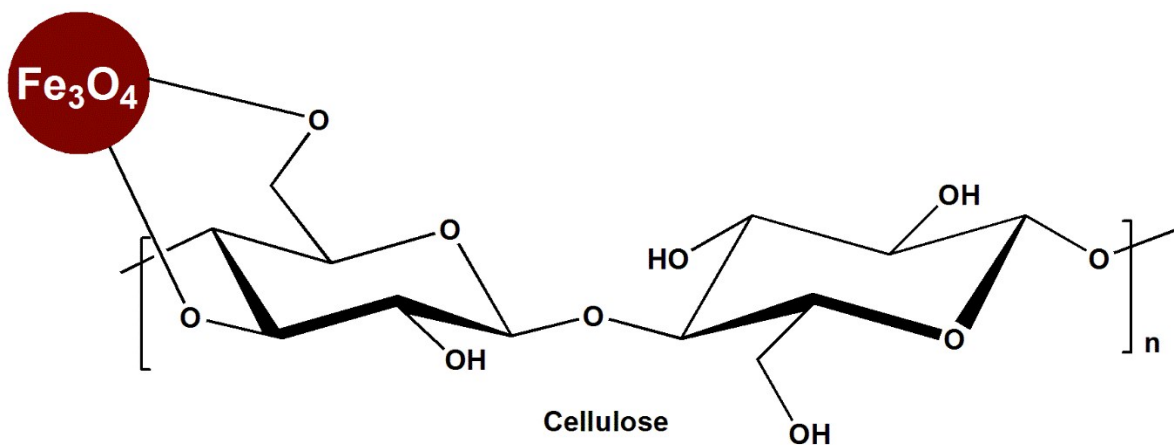

(a)

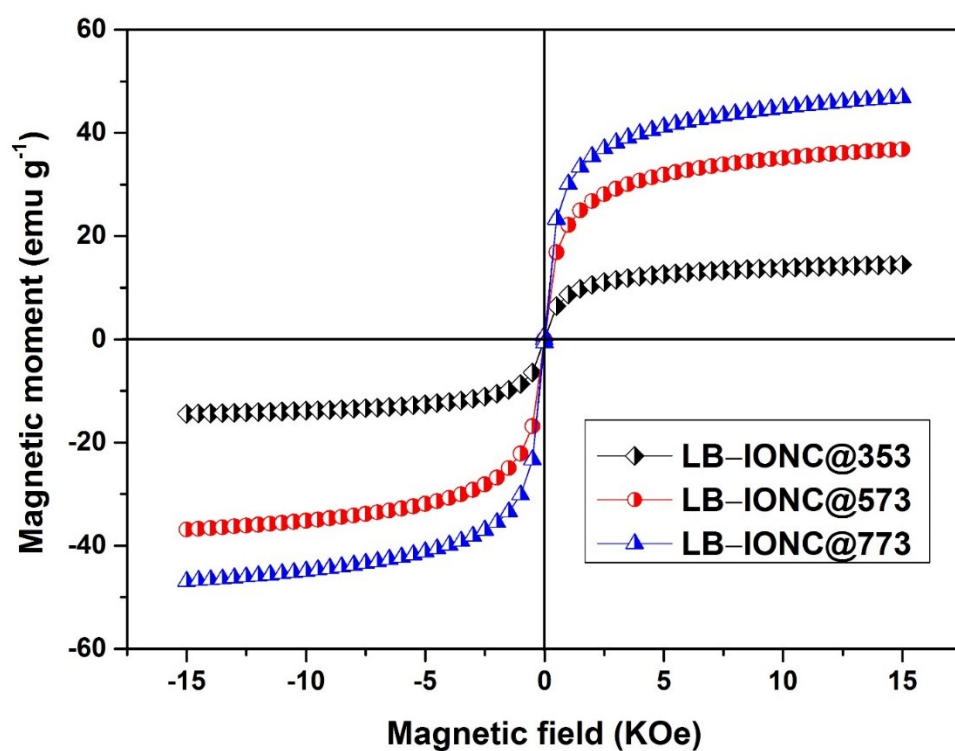

(b)

**Fig. S9** (a) Plausible interaction of the cellulose of the LB with the IONPs in the formation of the LB-IONCs and (b) room temperature magnetization curves of the LB-IONCs.

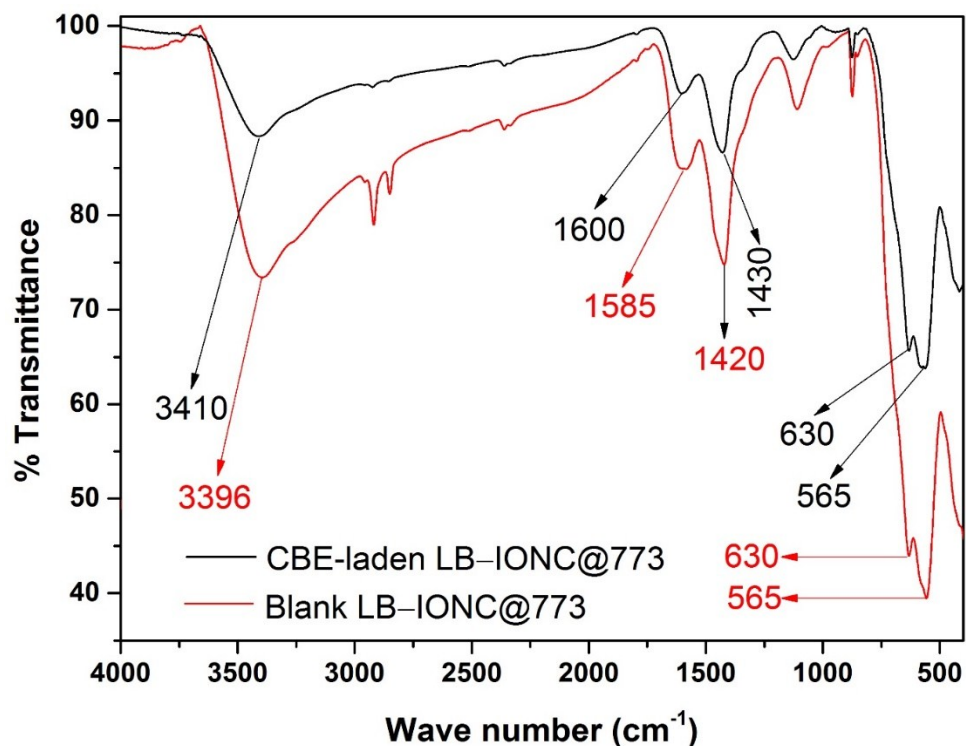

Fig. S10 FTIR spectra of the blank and the CBE-laden LB-IONC@773.

Table S1 Elemental compositions of the LB (papaya leaves) and the LB-IONCs.

| Element (Wt. %) | LB (Batch 1) | LB (Batch 2) | LB-IONC@353 | LB-IONC@573 | LB-IONC@773 |
|-----------------|--------------|--------------|-------------|-------------|-------------|
| Carbon          | 40.65        | 40.9         | 36.93       | 34.74       | 30.55       |
| Hydrogen        | 2.33         | 2.16         | 0.84        | 0.72        | 0.58        |
| Nitrogen        | 0.85         | 0.91         | 0.25        | 0.00        | 0.00        |
| Oxygen          | 38.69        | 38.85        | 41.67       | 36.45       | 33.11       |
